# Supplementary material for: Characterization of guanidiniocarbonyl pyrroles in water by pH-dependent UV Raman spectroscopy and component analysis
Source: Royal Society of Chemistry journal article supplement (doi:10.1039/b810908g), 2008-01-01
Supplement: b810908g.pdf [file b810908g.pdf]

**Supporting Information:**

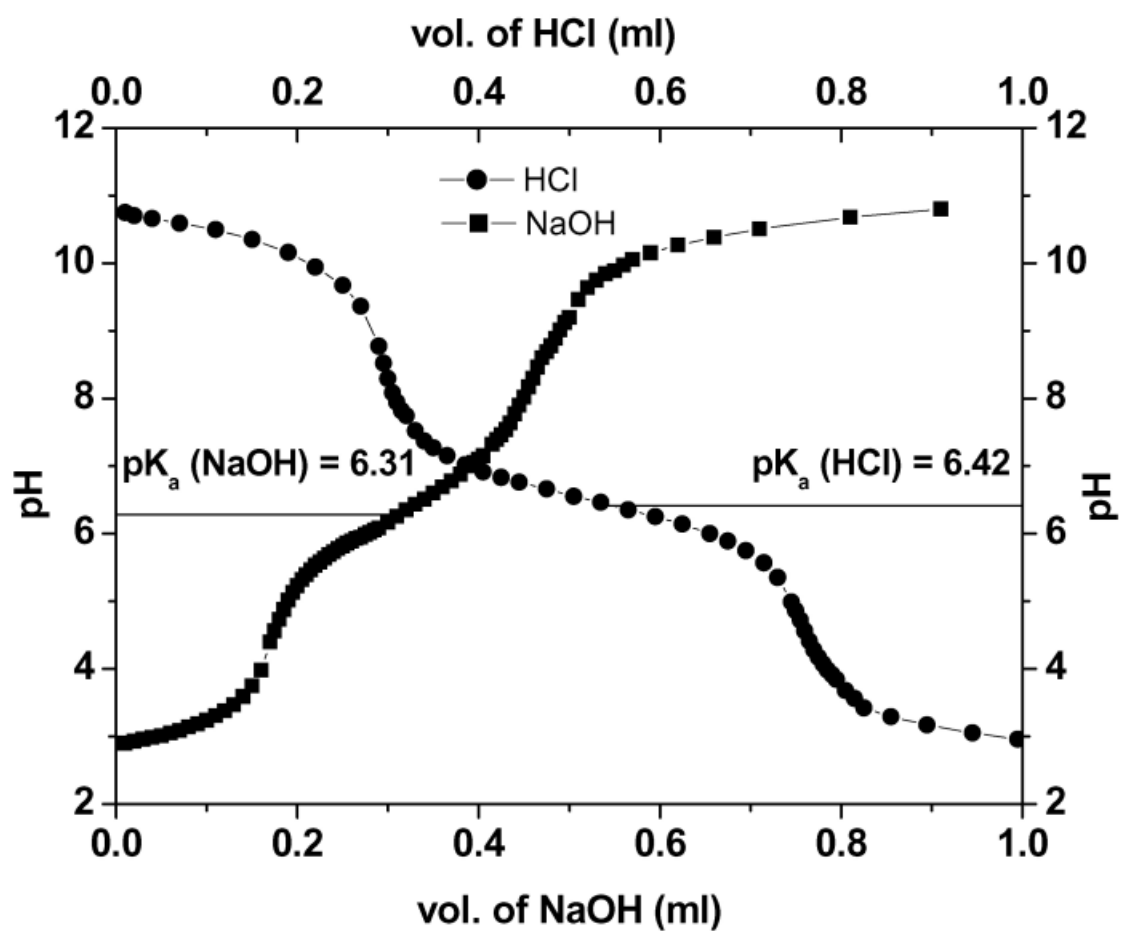

Fig. S1: pH titration curve for CBS-NH<sub>2</sub>.

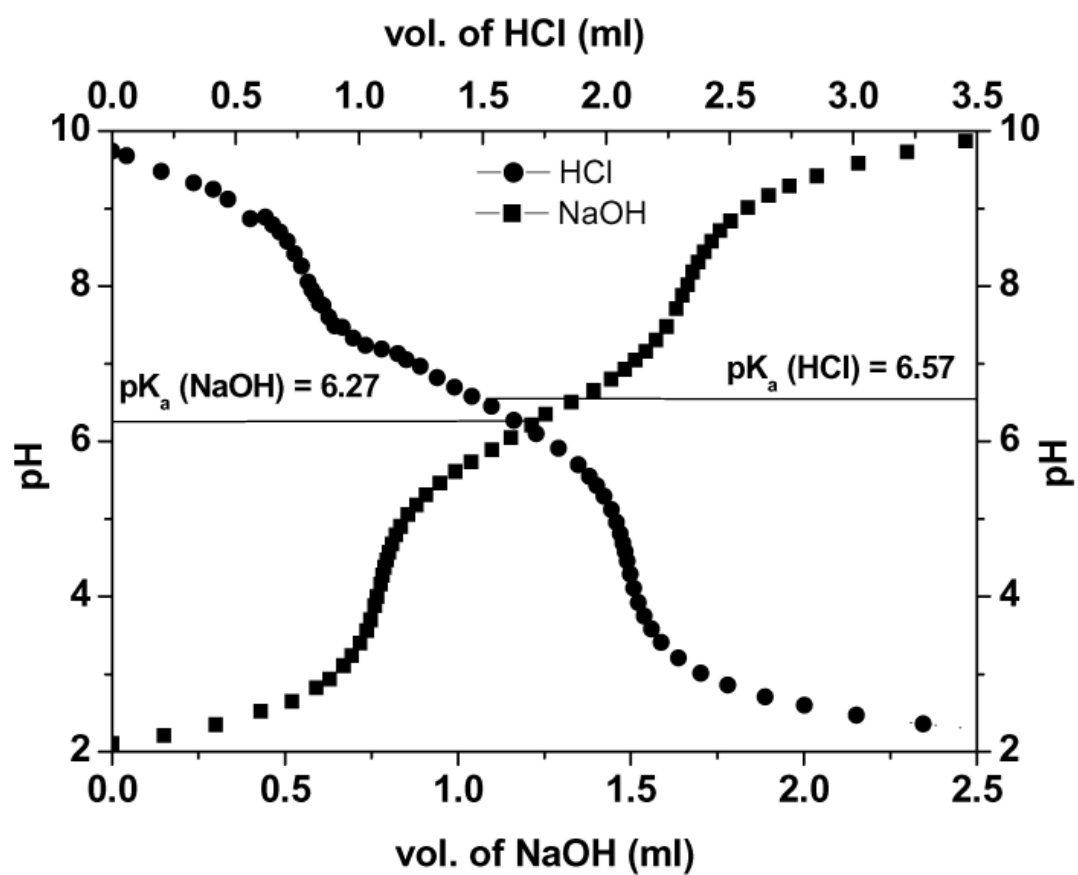

Fig. S2: pH titration curve for CBS-KKF-NH<sub>2</sub>.

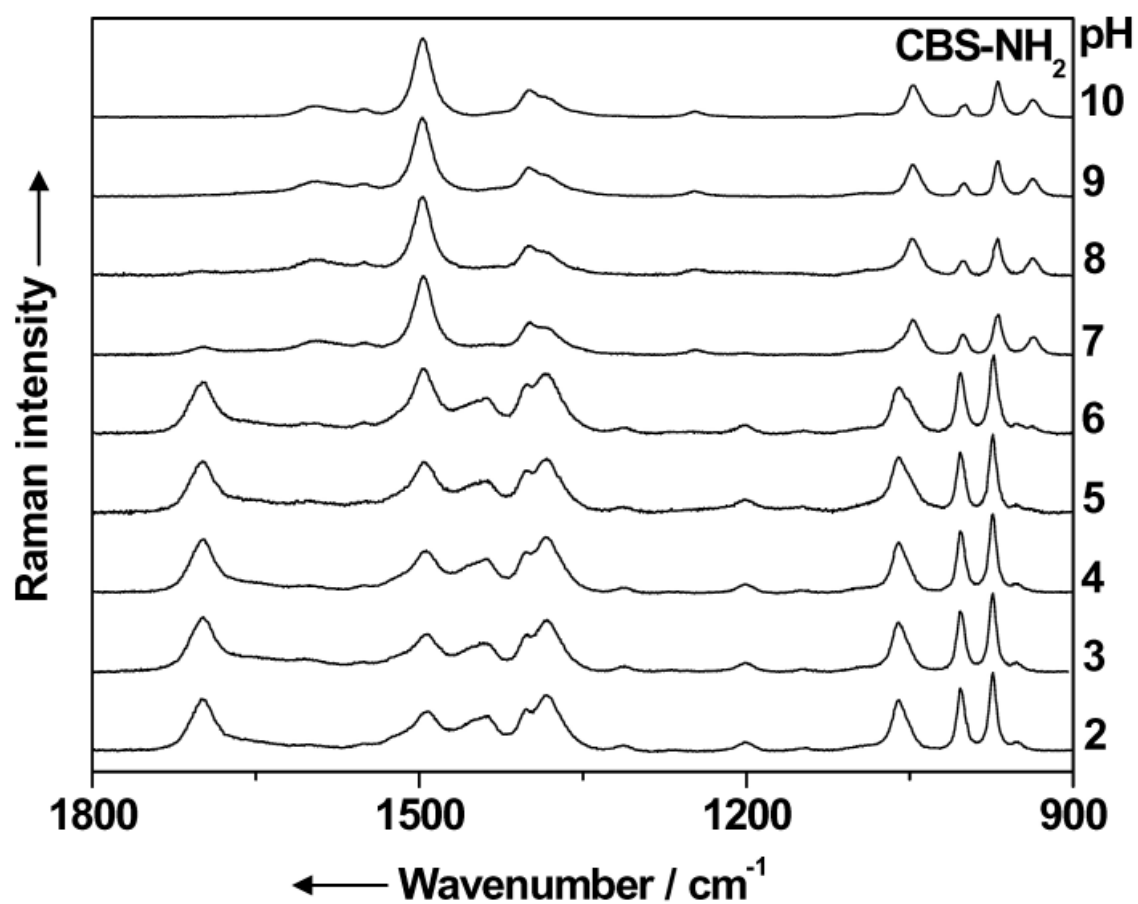

**Fig. S3:** UV Raman spectra of CBS-NH<sub>2</sub> (1 mM in water) in the range pH 2 to pH 10.

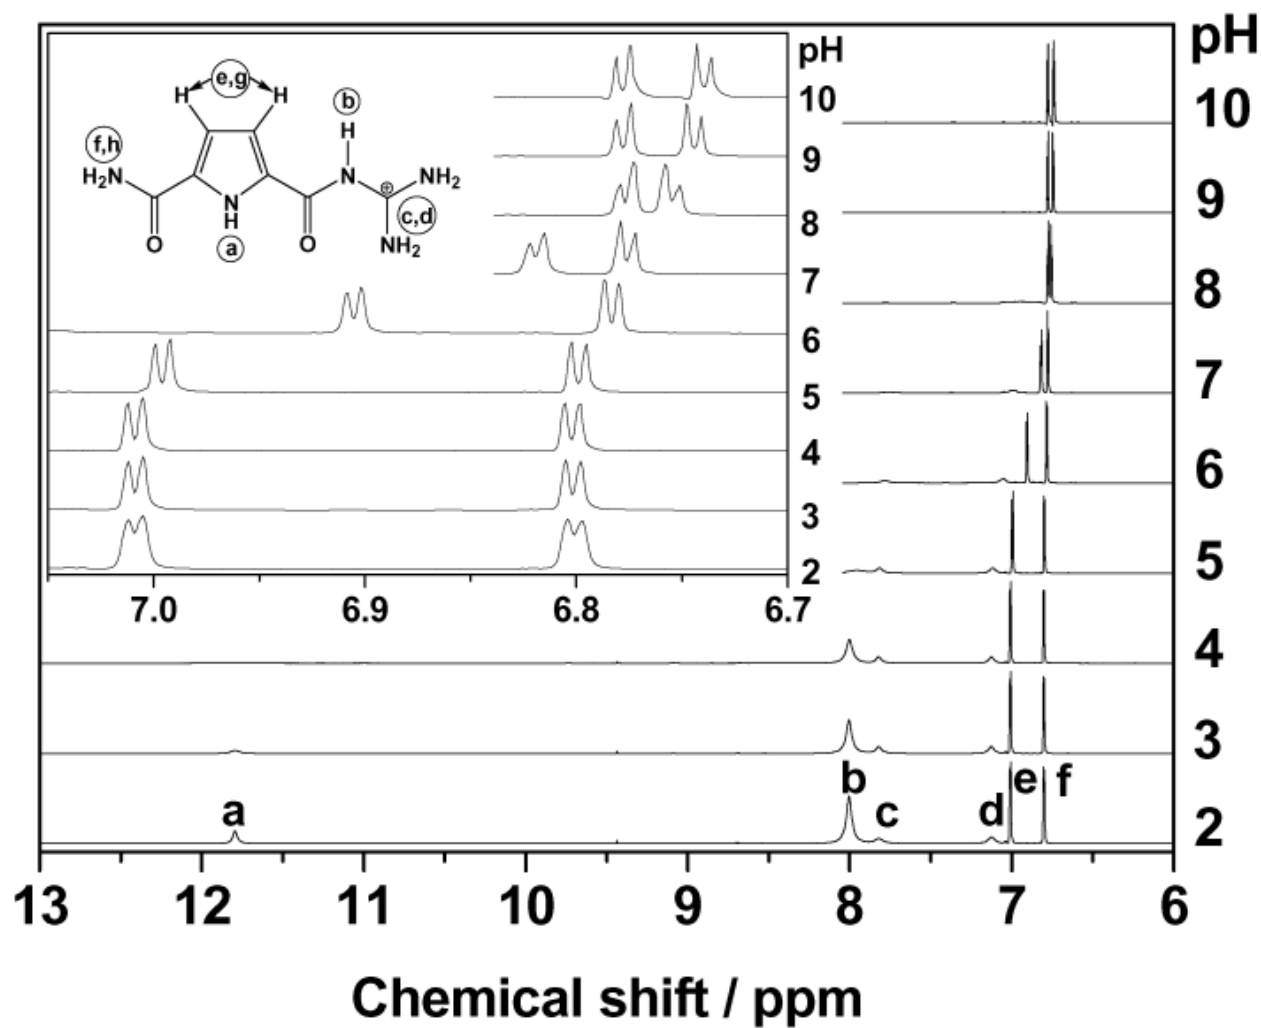

**Fig. S4:** NMR titration results for CBS-NH<sub>2</sub>. The inset shows an enlarged view of the region 6.7 ppm – 7.1 ppm together with the structure of CBS-NH<sub>2</sub> including information on proton assignment and proton exchange.

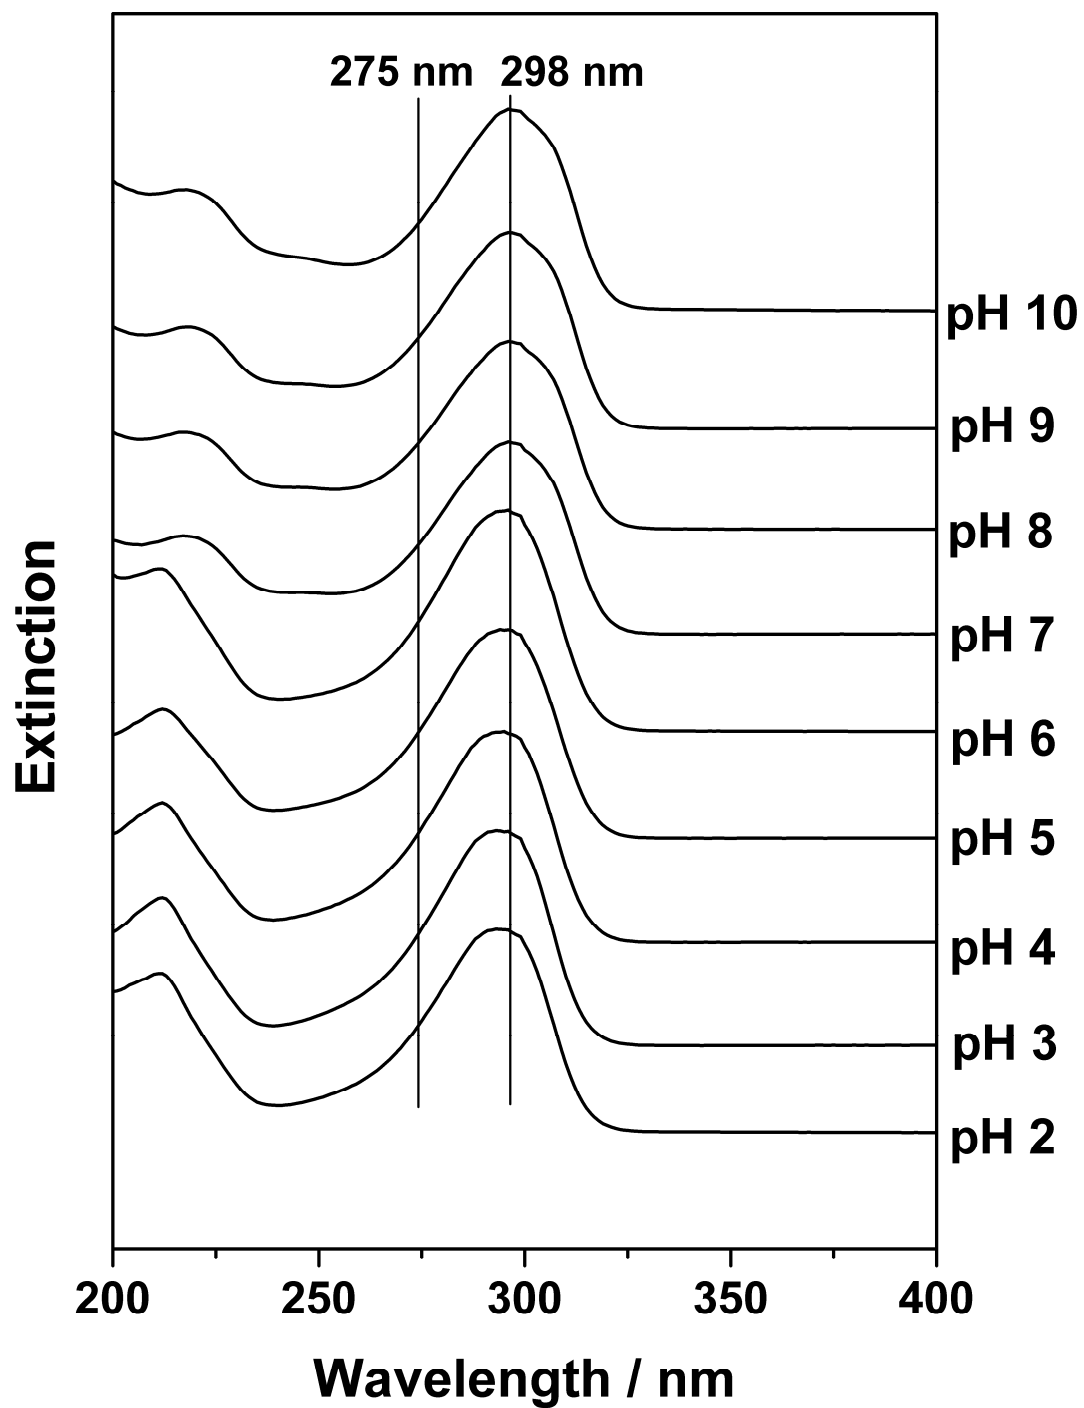

**Fig. S5:** Electronic absorption spectra of CBS-NH<sub>2</sub> from pH 2 -10.
